1 **Long-term repeatability in social behaviours suggests**  
2 **stable social phenotypes in wild chimpanzees**

3  
4 Patrick J. Tkaczynski<sup>1\*</sup>, Alexander Mielke<sup>2\*</sup>, Liran Samuni<sup>1,3,4</sup>, Anna Preis<sup>5</sup>, Roman Wittig<sup>1,4\*</sup>, Catherine  
5 Crockford<sup>1,4\*</sup>

6 <sup>1</sup> Department of Human Behaviour, Ecology and Culture, Max Planck Institute for Evolutionary Anthropology,  
7 Leipzig, Germany

8 <sup>2</sup> School of Anthropology & Museum Ethnography, University of Oxford, Oxford, UK

9 <sup>3</sup> Department of Human Evolutionary Biology, Harvard University, Cambridge, MA, USA

10 <sup>4</sup> Tai Chimpanzee Project, Centre Suisse de Recherches Scientifiques, Abidjan, Côte d'Ivoire

11 <sup>5</sup> Wild Chimpanzee Foundation, Conakry, Guinea

12 \* These authors contributed equally to the manuscript

13 **Corresponding author:** Patrick J. Tkaczynski (pjtresearchltd@gmail.com).

14

15

16

17

18

19

20

21

22

23

24

25

26

27

28

29

30

## 31 **Abstract**

32 Animals living in social groups navigate challenges when competing and cooperating with other group  
33 members. Changes in demographics, dominance hierarchies or ecological factors, such as food  
34 availability or disease prevalence, are expected to influence decision-making processes regarding social  
35 interactions. Therefore, it could be expected individuals show flexibility in social behaviour over time to  
36 maximise the fitness benefits of social living. To date, research across species has shown that stable  
37 inter-individual differences in social behaviour exist, but mostly over relatively short data collection time  
38 periods. Using data spanning over 20 years, we demonstrate that multiple social behaviours are highly  
39 repeatable over the long-term in wild chimpanzees, a long-lived species occupying a complex fission-  
40 fusion society. We controlled for temporal, ecological and demographic changes, limiting pseudo-  
41 repeatability. We conclude that chimpanzees living in natural ecological settings have relatively stable  
42 long-term social phenotypes over years. Determining the functional consequences of these stable social  
43 phenotypes across the chimpanzee lifespan will benefit our broader understanding of how social  
44 tendencies emerge and shape sociality in our closest living relatives.

45

## 46 **Introduction**

47 The fitness benefits of social bonds and social connectivity are well established across group-living  
48 animals, including in humans (1–11). Despite the adaptive advantages of maintaining social  
49 relationships, short-term strategies of social interaction avoidance could also improve fitness, such as  
50 during periods of disease outbreak (12). Similarly, during periods of social upheaval, such as instability in  
51 dominance hierarchies, individuals may change how they distribute their affiliative or aggressive social  
52 investment to reinforce key relationships or dominance position respectively (13,14). Fluctuations in  
53 resource availability (e.g. number of available mating partners or food availability) may also influence  
54 time allocation to affiliative social interactions, rates of aggression, social partner choice or general  
55 gregariousness (15,16). Lastly, an individual's physiological state may fluctuate over time, e.g. during  
56 pregnancy and/or the rearing of offspring, in turn influencing motivation for social behaviours (17).

57 Substantial variation in socioecological settings and internal state suggests individuals should show  
58 flexibility in their social interaction patterns (18). However, consistent individual differences in social  
59 behaviour have been identified across various animal taxa, suggesting group-living individuals tend to  
60 show stable tendencies in solving social problems and interacting with other group members (19–26).  
61 This raises the question of why some individuals appear to be consistently more or less cooperative,  
62 gregarious, or aggressive than others. This apparent consistency in behaviour may arise via alternative  
63 processes, which we address in this study.

64 A high degree of repeatability in a trait, i.e. the proportion of variation attributable to between-  
65 individual differences (27), may reflect underlying stable factors such as genetics and/or irreversible  
66 developmental adjustment to early life conditions (28–32). Under such a framework, individual patterns  
67 of social behaviour, and thus social phenotypes, emerge as a consequence of the interaction between  
68 genetics and exposure to the physical and social environment during development (30,32). Alternatively,  
69 consistent between-individual differences in behaviour and sociality may arise due to behavioural  
70 tendencies associated with specific life history stages or dominance positions, which appear to be  
71 individual phenotypes because the data collection protocol does not extend across the lifespan of the

72 species (33–35). Indeed, within the human literature, longitudinal studies suggest human behavioural  
73 tendencies and personality may be more labile than previously thought, with shifts in these tendencies  
74 predicted by a combination of age-related change or adjustment to particular life events, e.g. marriage  
75 (36–38). Distinguishing individual differences that are independent of life history or artefacts of socio-  
76 demographic variables requires long-term data reflecting changing life history within a particular study  
77 species.

78 The majority of non-human animal (hereafter animal) studies examining the repeatability of social  
79 behaviour have used comparatively short-term datasets, representing a limited period within the  
80 lifespan of the study species (33). In our study, we examine how social behaviours vary between  
81 individuals in wild, adult chimpanzees, utilising a behavioural dataset spanning over 20 years and more  
82 than 7500 full-day focal follows. We examine whether social behaviours (grooming, aggression and  
83 association) are repeatable over time both on a daily scale and when aggregated on a yearly level, with  
84 each sex analysed separately. By controlling for demographic and intrinsic factors, such as group size  
85 and age, we aim to determine the amount of variation in these social behaviours that is most likely  
86 attributable to individually stable phenotypes, thus limiting pseudo-repeatability (29).

87 Chimpanzees are an interesting study species to discern whether and how consistent individual  
88 differences in sociality arise and are maintained. These primates live in multi-female, multi-male groups  
89 with a high degree of fission-fusion dynamics (16,39), allowing potential for considerable fluctuation in  
90 social organisation during the course of their long lifespans (40). Chimpanzee societies also feature  
91 various cooperative behaviours, such as alliance formation, food sharing, group hunting, and territorial  
92 patrols, which likely impact on fitness and for which strong social relationships are required (41–44).  
93 Therefore, these individuals face diverse social environments and important choices regarding their  
94 social behaviour (45), which may predict a degree of flexibility in social tendencies.

95 In terms of dominance structure, when compared to female hierarchies, male hierarchies are dynamic  
96 and defined by high male-male competition, and there tends to be considerable reproductive skew  
97 towards high-ranking males (46–48). Although female dominance ranks do change during their lifespan,  
98 they are comparatively stable (49–52). Therefore, we expected a high degree of within-individual  
99 variation in aggressive tendencies in males in relation to lifetime fluctuations in dominance rank,  
100 whereas within-individual variation in aggression would be lower in females due to relatively stable  
101 hierarchy structure. Individual chimpanzees are highly strategic and flexible in grooming partner choice  
102 (45), while time devoted to grooming in this species can vary depending on demographic factors such as  
103 group size (53). Therefore, we expected low repeatability in grooming behaviour across long time  
104 periods. Lastly, chimpanzees sociality is characterised by a high degree of fission-fusion, allowing  
105 individuals to adjust to variation in within-group competition arising from ecological constraints, such as  
106 the availability of receptive mating partners or food (39). Competition will vary both seasonally and in  
107 the longer-term due changing group sizes or sex ratios. Therefore, we anticipated low repeatability for  
108 association behaviour as chimpanzees adjust to these fluctuations in competition.

109

## 110 **Methods**

### 111 *Study Groups and Data Collection*

112 Daily focal follow (54) data have been systematically collected by the Taï Chimpanzee Project, Côte  
113 d'Ivoire, since 1992 (55,56). We focussed on data collected since 1996, when data collection was  
114 consistent for behaviours relevant to this study and the control factors included in the models (see  
115 Statistical Analyses). This data includes observations of adult (>12 years) males and females from three  
116 fully habituated communities of chimpanzees: North (1996 – 2016), South (2002 – 2016), and East (2012  
117 – 2016).

118 We collated these data to identify repeatability in interaction rates on two levels: daily and yearly (with  
119 year ending on 31<sup>st</sup> August), allowing us to control for socioecological variables at different temporal  
120 scales. For each of these levels, we restricted the dataset to individuals with regular focal follows to  
121 ensure that the data were sufficient to capture their typical social behaviour.

122 For the analysis on the daily level, we included focal follow days of adult individuals that lasted at least  
123 three hours, and included individuals for whom at least 10 focal follow days were available, resulting in a  
124 dataset of 70 individuals (45 females, 25 males) and 7615 individual focal follow days (individual mean =  
125 109 days, max = 413 days).

126 For the analysis on the yearly level, we included adult individuals who were followed at least nine times  
127 in the time period from 1<sup>st</sup> September to 31<sup>st</sup> August and were present in their group for all this period,  
128 and who fulfilled these criteria at least in 3 years. This resulted in a dataset of 45 individuals (24 females,  
129 21 males) and 272 years (individual mean = 6 years, max = 15 years). The number of years or days per  
130 subject of the study are detailed in Table 1. *Social Phenotype*

131 On both the daily and the yearly level, we focused on three social variables: grooming, aggression, and  
132 association. We calculated variables from the perspective of the focal individual and with the focal as  
133 the actor (in case of the interactions) to ensure that they represent the individual's social propensity as  
134 much as possible.

135 For grooming, we extracted the time (in minutes) focal individuals spent grooming adult partners (we  
136 focused on grooming given to others rather than overall time grooming, i.e. including grooming  
137 received, as this would reflect a tendency to attract grooming partners rather than an individual  
138 tendency to groom). For aggression, we extracted the number of aggressive interactions in which the  
139 focal individual was the aggressor. Both these variables were calculated the same for the daily and  
140 yearly level. We calculated association differently for the two levels: on the daily level, we extracted the  
141 cumulative number of individuals with whom the focal individual was seen in the same 'party' (defined  
142 as all individuals within visual contact of the observer – usually < 35 m) during that day. On the yearly  
143 level, as cumulatively individuals will likely associate with all other partners during this timeframe  
144 limiting variation, we instead calculated the total strength of connections of individuals by summing  
145 their association with all adult group members, using the simple ratio index (57) for that year based on  
146 common party membership of individuals. We standardized association strength by dividing it by group  
147 size.

148 As association indices have to be standardized by an appropriate null model (58), we conducted  
149 permutation analyses to confirm that associations were different than would be expected by random.  
150 For this analysis, we generated 1000 permutations of randomizations of party membership in which the  
151 number of individuals per party was kept constant and subsequent parties that originally had the same  
152 party membership also remained the same after randomization to account for autocorrelation (59). The

153 overall number of times individuals appeared was not held constant, as we were interested in whether  
154 they would be more central/gregarious than expected. We subtracted the mean strength of individual's  
155 connections with all other group members arising from the permutations from the observed strength,  
156 effectively creating an index of gregariousness (above 0 = more connected than would be expected in  
157 that group in that year; below 0 = less connected than expected).

### 158 *Statistical Analyses*

159 All data were prepared and analyses were conducted using R 3.6.1 statistical software (60), with  
160 Generalized Linear Mixed Models (GLMM) fitted using the 'lme4' package (61). Models were fitted  
161 separately for males and females, for the dependent variables of aggression, grooming, and association,  
162 and for the daily and yearly levels of data aggregation, resulting in 12 models.

163 The **age** of all individuals was either known (for individuals who were not yet adult at the beginning of  
164 habituation) or was estimated in the beginning of the habituation period by experienced observers. Age  
165 ranged from 12 years (cut-off value) to 52 years, and the value assigned was either for the day (daily  
166 level) or the beginning of the yearly period (yearly level). We included age as a squared term in all  
167 models to account for potentially non-linear developmental patterns, e.g. individuals in their prime  
168 being more aggressive than younger and older individuals.

169 **Dominance rank** was calculated using a modification of the Elo rating method (62,63) based on  
170 unidirectional pant grunt vocalizations within each sex and standardized between 0 and 1 within each  
171 group. For the daily level, rank was extracted for each day of data an individual was observed. Rank was  
172 extracted on 31<sup>st</sup> August for each yearly level.

173 For females, as **reproductive state** and **infant age** influences gregariousness and sociality (64–68), on  
174 the daily level, we included a factor with five levels: maximum tumescence of sexual swellings, mother  
175 with a new-born infant (below 3 months of age), mother with an un-weaned offspring (below 4 years of  
176 age), mother with weaned but immature offspring, or none of the above. In instances where females  
177 had weaned or un-weaned offspring but were also maximally tumescent or had a new-born infant, they  
178 were classified as maximally tumescent or with a new-born infant, as these reproductive states were  
179 anticipated to have a greater effect on behaviour than the presence of older offspring (81-85). On the  
180 yearly level, we included whether they had no offspring throughout the year, had a new-born at any  
181 point, or un-weaned offspring. On the daily level for the analyses concerning males, we included the  
182 *number of females with maximally tumescent sexual swellings* on that day as a variable.

183 As the **sex ratio** of adult individuals in a group can influence social behaviour, we calculated the adult  
184 sex ratio (number of males/number of females) of each group at the start of the yearly period (for the  
185 yearly level) or of those individuals present in the focal individual's party during the day (for the daily  
186 level).

187 As interaction rates could be determined by the **number of available partners** (on the daily level) or  
188 **group size** (on the yearly level), we included these variables into the models. The yearly group size  
189 variable was standardized within groups, as there would otherwise be complete separation between the  
190 group identity and group size (as North group was considerably smaller than the others).

191 For both daily and yearly levels of analysis, we included an offset term for focal observation time (in  
192 hours; log-transformed) to account for differences in base rates of how often individuals could be

193 observed interacting. We accounted for seasonality effects in the daily level analyses by including the  
194 radians of Julian date as a control variable (69). All models included a random effect of group by year: as  
195 group dynamics change over time, and we do not expect the three communities to show the same  
196 interaction rates, this term accounts for overall differences that could be influencing how social  
197 individuals are.

#### 198 *Individual Model Structures*

199 For **aggression** (both on the daily and yearly level, and males and females), we fitted GLMMs with  
200 Poisson error structure and log link (70), using the number of bouts per day/year as outcome variable,  
201 and having a log-transformed offset term for observation time to control for differences in observation  
202 effort (71). For the daily level, we included age as a quadratic term, dominance rank, available partners  
203 (daily level) or group size (yearly level), sex ratio, and group identity as fixed effect predictors. For the  
204 daily level, we also included the number of females with maximum swellings and the cosine and sine  
205 functions to capture seasonal effects. We included the random intercept of Year within Group, to  
206 account for the fact that data collected in the same time period in the same group are not independent,  
207 and the random intercept of Individual Identity. We also included the random slopes for rank, age,  
208 available partners, and sex ratio in Individual Identity, and rank and available partners in Group Year  
209 (72).

210 For **grooming**, on both the daily and yearly level, we fitted LMMs with Gaussian error structure, using  
211 the log-transformed hourly grooming rate as outcome variable. The fixed effects and random effect  
212 structure were the same as described for the aggression models.

213 For **association** on the daily level, we fitted GLMMs with Poisson error structure, using the number of  
214 individuals that the focal associated with on the day as outcome variable, and the number of available  
215 partners in the group as offset term. The fixed effects were the same as described for aggression, bar  
216 the removal of the available partners from the fixed effects. For gregariousness on the yearly level, we  
217 used the difference between observed and expected association strength as outcome variable, fitting  
218 LMMs with Gaussian error structure, and the same fixed effects as described above.

219 For all models, we z-standardized continuous predictor variables to facilitate interpretation (73). We  
220 compared the full models including all predictors and random intercepts and slopes with a null model  
221 including all fixed and random effects except the random intercept and slope for the individual identity  
222 (19,74), to test whether stable individual differences had an impact on interaction distributions. To  
223 establish the strength of the observed effect of individual identity only (75), we applied the  
224 'r.squaredGLMM' function of the 'MuMIN' package (76) on a reduced model containing only the fixed  
225 effects and the random intercept and slopes for individual identity. We assumed that the variance in  
226 social behaviour that can be attributed to intra-individual stability can be captured by subtracting the  
227 variance explained by the fixed effects alone (marginal effect size) from that explained by the fixed  
228 effects and the individual random effect structure (conditional effect size) (75,77). Thus, for both the  
229 daily and the yearly level, both sexes, and all three social behaviours, we report whether the random  
230 effect significantly improved predictability, the marginal and conditional effect size, and their difference.

231 To avoid problems due to multicollinearity, we established the Variance Inflation Factors (VIF) of each  
232 model (78) using a simple linear regression of the fixed effects and applying the 'vif' function of the 'car'

233 package (79). The maximum VIF for any model was 3.13, indicating that collinearity was not an issue. For  
234 all Poisson models, we tested for overdispersion, which was not an issue in any model.

235

## 236 **Results**

237 We report the effect sizes attributed to the individual random effects and the comparison of the full  
238 model containing the random effect and the null model without it for the different models in Table 2  
239 and Figure 1.

240 In all models, including the random intercept and slopes of individual identity significantly improved  
241 model fit, indicating that for all social behaviours involved in this study, chimpanzees showed inter-  
242 individual differences that were consistent over time and could be detected on the daily and yearly  
243 level.

244 The variation explained by the random effect of individual identity varied between 0.14 and 0.61, and  
245 inter-individual differences tended to be more pronounced on the yearly level (mean = 0.40) than on the  
246 daily level (mean = 0.25). Thus, knowing the individual identity, for example, would allow one to predict  
247 50% of variation in female aggression rates across years (Table 1). For grooming, the results for both  
248 sexes were almost identical in terms of the impact of the random effect of identity (daily = 0.18/0.19,  
249 yearly = 0.40/0.42). In general, inter-individual differences between females were more stable than  
250 between males (overall female mean = 0.38 vs overall male mean = 0.28), especially on the yearly level  
251 (female yearly mean = 0.50 vs male yearly mean = 0.30). Thus, after accounting for age, dominance rank,  
252 reproductive state (for females), group-level sex ratio and group size, stable inter-individual differences  
253 in yearly interaction rates were more pronounced in females than in males. For grooming and  
254 aggression, the residuals of individuals that were represented in both the yearly and daily models were  
255 highly correlated (see Table 1), while this was not the case for gregariousness, where different outcome  
256 variables were used. Figures 2 and 3 illustrate inter-individual variation in grooming, aggression and  
257 association at the daily and yearly levels in male and female chimpanzees respectively.

258

259

260

261

262

263

264

265

266

267



268 Table 1: Total numbers of observations for focal individuals at the daily and yearly level.

| Individual | Sex | Days | Years | Individual | Sex | Days | Years |
|------------|-----|------|-------|------------|-----|------|-------|
| 1          | M   | 146  | 4     | 36         | F   | 76   | 3     |
| 2          | F   | 130  | 7     | 37         | F   | 413  | 11    |
| 3          | F   | 33   | -     | 38         | F   | 12   | -     |
| 4          | F   | 387  | 10    | 39         | F   | 377  | 14    |
| 5          | M   | 95   | 3     | 40         | M   | 181  | 10    |
| 6          | F   | 18   | -     | 41         | M   | 152  | 5     |
| 7          | M   | 33   | -     | 42         | F   | 98   | 6     |
| 8          | F   | 47   | 3     | 43         | F   | 59   | 3     |
| 9          | F   | 16   | -     | 44         | F   | 49   | 3     |
| 10         | F   | 56   | 3     | 45         | F   | 327  | 15    |
| 11         | F   | 25   | -     | 46         | F   | 70   | 3     |
| 12         | F   | 64   | 3     | 47         | M   | 104  | 4     |
| 13         | F   | 19   | -     | 48         | F   | 11   | -     |
| 14         | M   | 68   | 4     | 49         | M   | 88   | 3     |
| 15         | F   | 202  | 11    | 50         | M   | 23   | -     |
| 16         | M   | 149  | 4     | 51         | F   | 28   | -     |
| 17         | F   | 13   | -     | 52         | F   | 34   | -     |
| 18         | F   | 11   | -     | 53         | M   | 266  | 8     |
| 19         | M   | 131  | 6     | 54         | M   | 101  | 3     |
| 20         | F   | 106  | 6     | 55         | F   | 298  | 13    |
| 21         | F   | 18   | -     | 56         | F   | 130  | 5     |
| 22         | M   | 118  | 3     | 57         | M   | 27   | -     |
| 23         | F   | 76   | 4     | 58         | F   | 14   | -     |
| 24         | F   | 251  | 11    | 59         | M   | 83   | 4     |
| 25         | M   | 126  | 5     | 60         | F   | 188  | 8     |
| 26         | F   | 138  | 3     | 61         | F   | 59   | -     |
| 27         | F   | 20   | -     | 62         | F   | 40   | -     |
| 28         | M   | 193  | 8     | 63         | M   | 92   | 3     |
| 29         | F   | 166  | 6     | 64         | M   | 245  | 10    |
| 30         | M   | 190  | 7     | 65         | F   | 33   | -     |
| 31         | F   | 124  | 5     | 66         | F   | 15   | -     |
| 32         | F   | 51   | 3     | 67         | M   | 21   | -     |
| 33         | M   | 84   | 3     | 68         | F   | 40   | -     |
| 34         | F   | 13   | -     | 69         | F   | 79   | -     |
| 35         | M   | 235  | 8     | 70         | M   | 230  | 8     |

269

270



271 **Table 2: Repeatability coefficients of chimpanzee social behaviours.** Effect sizes and results of full null model  
 272 comparisons for the models testing the impact of the individual random intercept and slopes on grooming rates,  
 273 aggression bouts, and association in male and female Tai chimpanzees on a daily and yearly level. The correlation  
 274 between the two levels was conducted on the random intercept residuals of individuals who were present in both  
 275 datasets.

|        |             |        | Marginal R <sup>2</sup> | Conditional R <sup>2</sup> | Individual R <sup>2</sup> | X <sup>2</sup> <sub>df=5</sub> | p      | Correlation<br>Daily – Yearly |
|--------|-------------|--------|-------------------------|----------------------------|---------------------------|--------------------------------|--------|-------------------------------|
| Female | grooming    | daily  | 0.08                    | 0.26                       | 0.19                      | 50.87                          | <0.001 | 0.73                          |
|        |             | Yearly | 0.20                    | 0.60                       | 0.40                      | 44.42                          | <0.001 |                               |
|        | aggression  | Daily  | 0.11                    | 0.25                       | 0.14                      | 13.55                          | 0.019  | 0.70                          |
|        |             | yearly | 0.17                    | 0.67                       | 0.50                      | 13.04                          | 0.011  |                               |
|        | association | daily  | 0.25                    | 0.67                       | 0.42                      | 450.93                         | <0.001 | 0.30                          |
|        |             | yearly | 0.11                    | 0.72                       | 0.61                      | 36.29                          | <0.001 |                               |
| Male   | grooming    | daily  | 0.10                    | 0.28                       | 0.18                      | 50.71                          | <0.001 | 0.93                          |
|        |             | yearly | 0.33                    | 0.74                       | 0.42                      | 28.32                          | <0.001 |                               |
|        | aggression  | daily  | 0.30                    | 0.54                       | 0.24                      | 150.69                         | <0.001 | 0.55                          |
|        |             | yearly | 0.67                    | 0.93                       | 0.26                      | 202.19                         | <0.001 |                               |
|        | association | daily  | 0.47                    | 0.83                       | 0.35                      | 71.08                          | <0.001 | 0.20                          |
|        |             | yearly | 0.24                    | 0.45                       | 0.21                      | 9.61                           | 0.022  |                               |

276

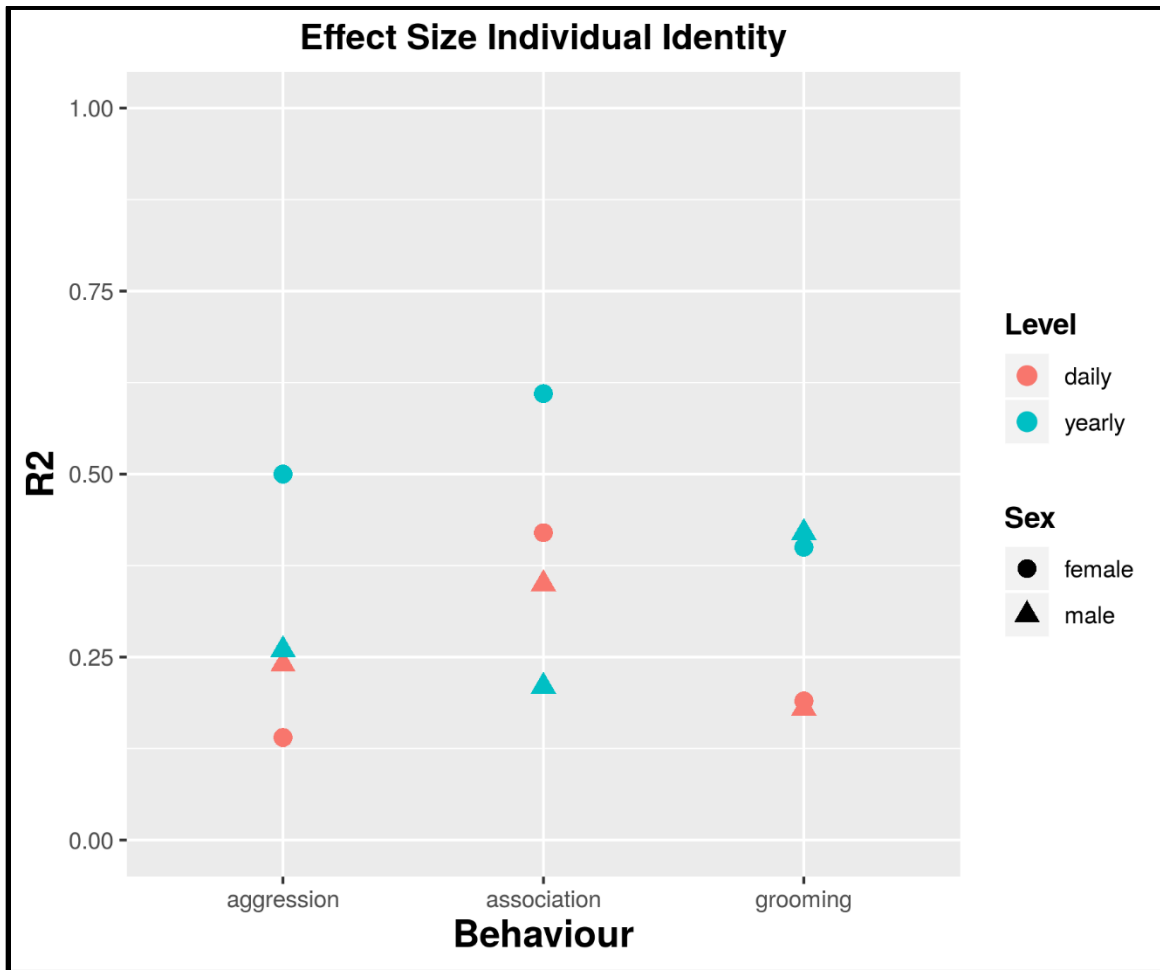

277

278 **Figure 1: Repeatability of Chimpanzee Social Behaviours.** Overview of the effect sizes attributed to the  
279 individual random effect, delineated by behaviour, sex, and timeframe (yearly vs daily) over 20 years of  
280 data.

281

282

283

284

285

286

287

288

289

290

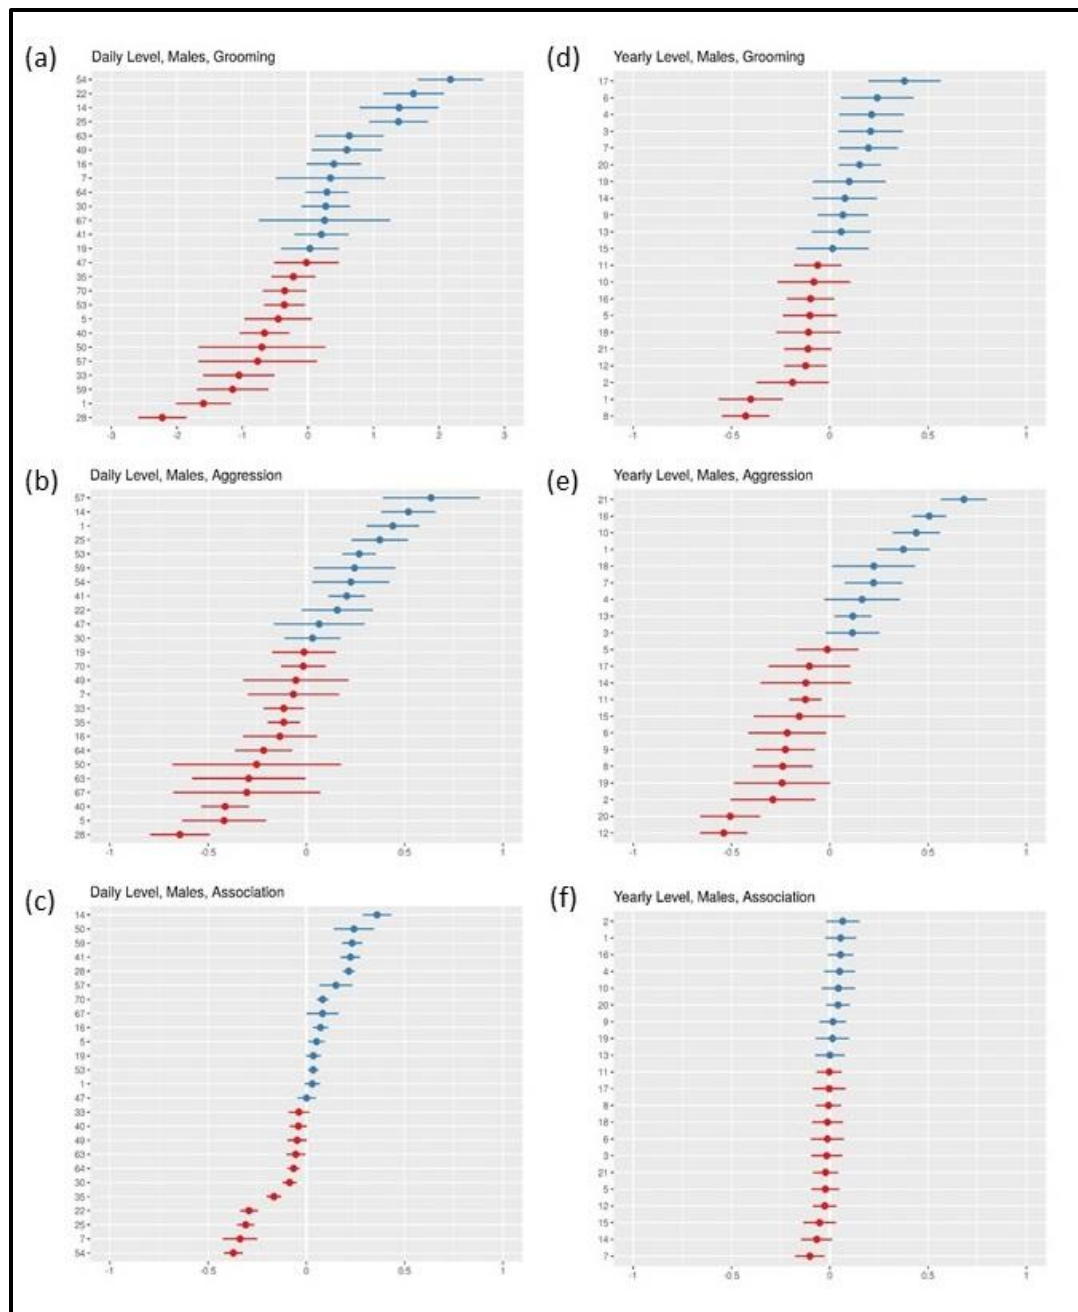

291

292 **Figure 2: Inter-individual variation in grooming, aggression and association in male chimpanzees.** Plots include  
293 random effect coefficients for individual identity from models examining variation in grooming, aggression and  
294 association in male at both the daily (a, b, c) and yearly (d, e, f) level of aggregation. The x-axis indicates the  
295 random effect coefficient; the y-axis indicates individual identities. Blue individuals expressed the variable of  
296 interest (grooming, aggression, and association) more than the average expression of the variable given all fixed  
297 and random effects within the model, red individuals expressed the variables less than the given average.

298

299

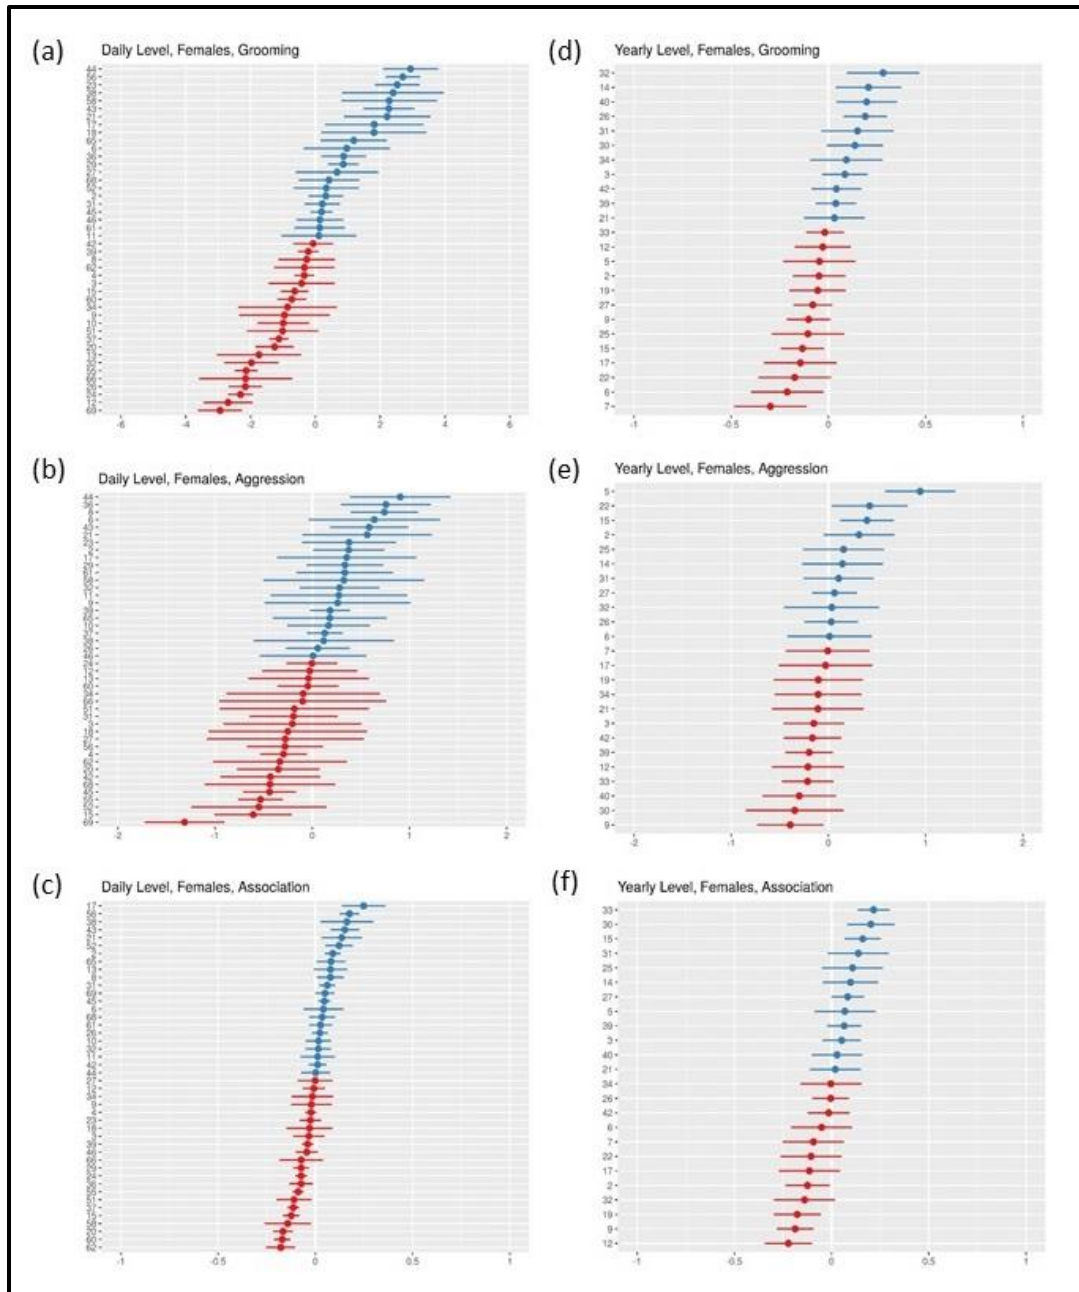

300

301 **Figure 2: Inter-individual variation in grooming, aggression and association in female chimpanzees.** Plots include  
302 random effect coefficients for individual identity from models examining variation in grooming, aggression and  
303 association in male at both the daily (a, b, c) and yearly (d, e, f) level of aggregation. The x-axis indicates the  
304 random effect coefficient; the y-axis indicates individual identities. Blue individuals expressed the variable of  
305 interest (grooming, aggression, and association) more than the average expression of the variable given all fixed  
306 and random effects within the model, red individuals expressed the variables less than the given average.

307

308

## 309 Discussion

310 Our study reveals a high degree of repeatability in social behaviour in wild chimpanzees over several  
311 years and in many of our subjects, over a sizeable proportion of the adult lifespan of the species. The  
312 repeatability estimates for social behaviour in our study were comparable to an average repeatability  
313 estimate of behavioural traits across numerous animal taxa formerly generated by a meta-analytical  
314 study ( $R^2=0.37$ ; (80)). Importantly, unlike many former studies, using a comprehensive dataset, we were  
315 able to control for temporal, seasonal and demographic changes across the long-term study period that  
316 may influence variation in social behaviours, and thus limit pseudo-repeatability (29). As such, our  
317 method provides reasonable confidence that our repeatability estimates reflect stable social behaviour  
318 phenotypes.

319 The three behaviours of aggression, grooming (affiliation) and association represent three important  
320 components of sociality for chimpanzees, facilitating social goals such as dominance rank attainment  
321 (81,82) and the formation of social bonds (41,83), both of which influence lifetime fitness (42,43,84–86).  
322 Our study expands on former research in this field in terms of its scale, both temporally and in the range  
323 of behaviours examined, in a wild population, demonstrating that social phenotypes are a phenomenon  
324 in long-lived species occupying complex social environments.

325 Repeatability was generally lower in the daily versus the yearly level, with implications for data  
326 aggregation and interpretation in repeatability analyses. The daily measures incorporate more data  
327 points with potentially fewer social interactions within them compared to the yearly measures. This may  
328 result in more random error and thus lower repeatability estimates for the daily level. Nevertheless, the  
329 differences between the daily and yearly measures are still informative.

330 The contrast between daily and yearly levels of repeatability was strongest in female aggression, with  
331 much higher repeatability estimates in the latter. Male aggression repeatability was low for both the  
332 daily and yearly levels. This likely reflects sex-differences in dominance hierarchies. Males use  
333 aggression to improve their position within the dominance hierarchy and to increase their reproductive  
334 opportunities (87–90). Therefore, their aggression rates can fluctuate due to variation in hierarchy  
335 stability and male-male competition (14,89). Compared to males, female chimpanzee hierarchies are  
336 relatively stable (50,52) and female aggression rates are less likely to be determined by variability in  
337 these factors. Instead, female aggression in chimpanzees is more likely determined by individual  
338 tendencies and seasonal, but comparatively predictable, variation in food availability (50). However,  
339 aggression is a costly behaviour in terms of energetics (91,92) and comes with inherent risks of injury,  
340 which could even be lethal in certain chimpanzee populations (93,94). Therefore, although in the long-  
341 term certain females are more aggressive than others, on a day-to-day basis, individuals are likely to be  
342 selective in when to be aggressive, reducing inter-individual differences and repeatability measures.

343 Females had higher repeatability estimates than those calculated for males for association. However, for  
344 both sexes, within-individual variation appeared much lower for association compared to the other  
345 social measures. We did not observe sex differences in the repeatability estimates for grooming and  
346 within-individual variation in this behaviour again seems comparable for each sex. Compared to other  
347 populations, Tai chimpanzees are considered highly gregarious, with the contrast in this population-level  
348 difference most apparent when examining female gregariousness (64). Our results suggest that these  
349 chimpanzees have relatively invariable preferential party sizes and rates of association. While grooming

350 forms an important component of social bond formation (83), chimpanzees also make contingent  
351 grooming choices based on a range of parameters, such as audience, partner rank or context (e.g.  
352 reconciliation after an aggression) (67). Therefore, our results highlight this contrast in social decision  
353 making between levels of association (constrained preferences) and grooming (flexible choices).

354 Our approach tested for stable individual differences in social tendencies that are independent of  
355 socioecological influences on the rates of behaviour. As a growing number of longitudinal studies have  
356 highlighted, age- or life event-related changes in behavioural tendencies are apparent in humans (36–  
357 38). One approach to further characterise and understand social phenotypes in chimpanzees may be to  
358 explore whether certain social phenotypes respond to comparable life events that occur within the  
359 species and to what degree. For example, the stable social phenotypes generated in the present study  
360 may predict behavioural and physiological responses to the loss of positions within a dominance  
361 hierarchy. This would allow the testing of consistent individual differences in *plasticity* to changing  
362 environments or internal state and provide insight on the mechanisms maintaining individual  
363 differences in social phenotypes over time. Going further, between species comparisons within the  
364 primate order on the degree of long-term consistency and short-term plasticity in social tendencies to  
365 changing socioecological settings may inform on the evolution of apparently labile social tendencies in  
366 humans. For example, comparing the long-term social phenotypes of species with a lower degree of  
367 fission-fusion may inform on how fission-fusion dynamics influence social tendencies.

368 Consistent individual differences in behaviour can manifest due to genetic effects and/or during  
369 developmental plasticity to early life conditions, (31). Our results suggest these social phenotypes can  
370 then be stable over many years in chimpanzees. As previously highlighted, social relationships can  
371 confer fitness benefits, but they can also be costly if they expose individuals to increased disease or  
372 competition (39,95–97). That some adult females (which will also typically be mothers) are more  
373 aggressive, affiliative and gregarious than others is significant to offspring development. Given  
374 repeatability, mothers consistently expose their offspring to particular environments, whether more or  
375 less social, which in turn may shape the social phenotype of the offspring (98,99). Having revealed that  
376 stable social phenotypes can be maintained over years in one of our closest living relatives, an important  
377 next step in this species will be disentangling the genetic and environmental contributions to these  
378 phenotypes by taking a developmental approach to their emergence in younger subjects.

379

## 380 **Acknowledgments**

381 We thank the Ministère de l'Enseignement supérieur et de la Recherche scientifique and the Ministère  
382 des Eaux et Forêts of Côte d'Ivoire, and the Office Ivoirien des Parcs et Réserves for permission to  
383 conduct the study. We are grateful to the staff of the Taï Chimpanzee Project and the Centre Suisse de  
384 Recherches Scientifiques for support. We are indebted to the numerous field staff that have collected  
385 the data presented.

386

## 387 **Funding**

388 Core funding for the Tai Chimpanzee Project is provided by the Max Planck Society since 1997. PT, CC  
389 and RMW were supported by the European Research Council (ERC; Grant Agreement No 679787). LS  
390 was supported by the Minerva Foundation. AP was supported by the Leakey Foundation.

391

## 392 **References**

- 393 1. McFarland R, Majolo B. Coping with the cold: predictors of survival in wild Barbary macaques,  
394 *Macaca sylvanus*. *Biology Letters*. 2013 Aug 23;9(4):20130428.
- 395 2. Lehmann J, Majolo B, McFarland R. The effects of social network position on the survival of wild  
396 Barbary macaques, *Macaca sylvanus*. *Behav Ecol*. 2016 Jan 1;27(1):20–8.
- 397 3. Nuñez CMV, Adelman JS, Rubenstein DI. Sociality increases juvenile survival after a catastrophic  
398 event in the feral horse ( *Equus caballus* ). *Behav Ecol*. 2015 Jan 1;26(1):138–47.
- 399 4. Cameron EZ, Setsaas TH, Linklater WL. Social bonds between unrelated females increase  
400 reproductive success in feral horses. *Proc Natl Acad Sci USA*. 2009 Aug 18;106(33):13850–3.
- 401 5. McFarland R, Murphy D, Lusseau D, Henzi SP, Parker JL, Pollet TV, et al. The ‘strength of weak ties’  
402 among female baboons: fitness-related benefits of social bonds. *Animal Behaviour*. 2017 Apr  
403 1;126:101–6.
- 404 6. Silk J, Alberts SC, Altmann J. Social Bonds of Female Baboons Enhance Infant Survival. *Science*.  
405 2003 Nov 14;302(5648):1231–4.
- 406 7. Silk J, Beehner J, Thore T, Crockford C, Engh A, Moscovice L, et al. The benefits of social capital:  
407 close social bonds among female baboons enhance offspring survival. *Proceedings of the Royal  
408 Society B: Biological Sciences*. 2009 Sep 7;276(1670):3099–104.
- 409 8. Silk JB, Beehner JC, Bergman TJ, Crockford C, Engh AL, Moscovice LR, et al. Strong and consistent  
410 social bonds enhance the longevity of female baboons. *Curr Biol*. 2010 Aug 10;20(15):1359–61.
- 411 9. Archie E, Tung T, Clark M, Altmann J, Alberts SC. Social affiliation matters: both same-sex and  
412 opposite-sex relationships predict survival in wild female baboons. *Proceedings of the Royal  
413 Society B: Biological Sciences*. 2014 Oct 22;281(1793):20141261.
- 414 10. House JS, Landis KR, Umberson D. Social relationships and health. *Science*. 1988 Jul  
415 29;241(4865):540–5.
- 416 11. Campbell LAD, Tkaczynski PJ, Lehmann J, Mouna M, Majolo B. Social thermoregulation as a  
417 potential mechanism linking sociality and fitness: Barbary macaques with more social partners  
418 form larger huddles. *Scientific Reports*. 2018 Apr 17;8(1):6074.
- 419 12. Cauchemez S, Bhattarai A, Marchbanks TL, Fagan RP, Ostroff S, Ferguson NM, et al. Role of social  
420 networks in shaping disease transmission during a community outbreak of 2009 H1N1 pandemic  
421 influenza. *PNAS*. 2011 Feb 15;108(7):2825–30.



- 422 13. Wittig RM, Crockford C, Lehmann J, Whitten PL, Seyfarth RM, Cheney DL. Focused grooming  
423 networks and stress alleviation in wild female baboons. *Hormones and Behavior*. 2008 Jun  
424 1;54(1):170–7.
- 425 14. Muller MN, Wrangham RW. Dominance, aggression and testosterone in wild chimpanzees: a test  
426 of the ‘challenge hypothesis.’ *Animal Behaviour*. 2004 Jan 1;67(1):113–23.
- 427 15. Dunbar RIM, Korstjens AH, Lehmann J. Time as an ecological constraint. *Biological Reviews*.  
428 2009;84(3):413–29.
- 429 16. Lehmann J, Korstjens AH, Dunbar RIM. Fission–fusion social systems as a strategy for coping with  
430 ecological constraints: a primate case. *Evol Ecol*. 2007 Sep 1;21(5):613–34.
- 431 17. Seebacher F, Ward AJW, Wilson RS. Increased aggression during pregnancy comes at a higher  
432 metabolic cost. *Journal of Experimental Biology*. 2013 Mar 1;216(5):771–6.
- 433 18. Oliveira RF. Social plasticity in fish: integrating mechanisms and function. *Journal of Fish Biology*.  
434 2012;81(7):2127–50.
- 435 19. Aplin LM, Firth JA, Farine DR, Voelkl B, Crates RA, Culina A, et al. Consistent individual differences  
436 in the social phenotypes of wild great tits, *Parus major*. *Animal Behaviour*. 2015 Oct 1;108:117–27.
- 437 20. Blaszczyk MB. Consistency in social network position over changing environments in a seasonally  
438 breeding primate. *Behav Ecol Sociobiol*. 2017 Dec 27;72(1):11.
- 439 21. Blumstein DT, Petelle MB, Wey TW. Defensive and social aggression: repeatable but independent.  
440 *Behav Ecol*. 2013 Mar 1;24(2):457–61.
- 441 22. Finger JS, Guttridge TL, Wilson ADM, Gruber SH, Krause J. Are some sharks more social than  
442 others? Short- and long-term consistencies in the social behavior of juvenile lemon sharks. *Behav*  
443 *Ecol Sociobiol*. 2017 Dec 29;72(1):17.
- 444 23. Fisher DN, Rodríguez-Muñoz R, Tregenza T. Wild cricket social networks show stability across  
445 generations. *BMC Evolutionary Biology*. 2016 Jul 27;16(1):151.
- 446 24. Jacoby DMP, Fear LN, Sims DW, Croft DP. Shark personalities? Repeatability of social network traits  
447 in a widely distributed predatory fish. *Behav Ecol Sociobiol*. 2014 Dec 1;68(12):1995–2003.
- 448 25. Krause S, Wilson ADM, Ramnarine IW, Herbert-Read JE, Clément RJG, Krause J. Guppies occupy  
449 consistent positions in social networks: mechanisms and consequences. *Behav Ecol*. 2017 Apr  
450 1;28(2):429–38.
- 451 26. Wuerz Y, Krüger O. Personality over ontogeny in zebra finches: long-term repeatable traits but  
452 unstable behavioural syndromes. *Frontiers in Zoology*. 2015 Aug 24;12(1):S9.
- 453 27. Nakagawa S, Schielzeth H. Repeatability for Gaussian and non-Gaussian data: a practical guide for  
454 biologists. *Biol Rev Camb Philos Soc*. 2010 Nov;85(4):935–56.

- 455 28. Mitchell DJ, Dujon AM, Beckmann C, Biro PA. Temporal autocorrelation: a neglected factor in the  
456 study of behavioral repeatability and plasticity. *Behav Ecol* [Internet]. 2019 [cited 2019 Nov 4];  
457 Available from: [https://academic.oup.com/beheco/advance-](https://academic.oup.com/beheco/advance-article/doi/10.1093/beheco/arz180/5610999)  
458 [article/doi/10.1093/beheco/arz180/5610999](https://academic.oup.com/beheco/advance-article/doi/10.1093/beheco/arz180/5610999)
- 459 29. Wilson AJ. How should we interpret estimates of individual repeatability? *Evolution Letters*.  
460 2018;2(1):4–8.
- 461 30. Monaghan P. Early growth conditions, phenotypic development and environmental change.  
462 *Philosophical Transactions of the Royal Society B: Biological Sciences*. 2008 May  
463 12;363(1497):1635–45.
- 464 31. Wilson V, Guenther A, Øverli Ø, Seltmann MW, Altschul D. Future Directions for Personality  
465 Research: Contributing New Insights to the Understanding of Animal Behavior. *Animals*. 2019  
466 May;9(5):240.
- 467 32. Kaiser A, Merckx T, Van Dyck H. Behavioural repeatability is affected by early developmental  
468 conditions in a butterfly. *Animal Behaviour*. 2019 Nov 1;157:219–26.
- 469 33. Brent LJJ, Ruiz-Lambides A, Platt ML. Persistent social isolation reflects identity and social context  
470 but not maternal effects or early environment. *Scientific Reports*. 2017 Dec 19;7(1):1–11.
- 471 34. Sih A, Mathot KJ, Moirón M, Montiglio P-O, Wolf M, Dingemanse NJ. Animal personality and state–  
472 behaviour feedbacks: a review and guide for empiricists. *Trends in Ecology & Evolution*. 2015 Jan  
473 1;30(1):50–60.
- 474 35. Réale D, Garant D, Humphries MM, Bergeron P, Careau V, Montiglio P-O. Personality and the  
475 emergence of the pace-of-life syndrome concept at the population level. *Philosophical*  
476 *Transactions of the Royal Society B: Biological Sciences*. 2010 Dec 27;365(1560):4051–63.
- 477 36. Costa PT, McCrae RR, Löckenhoff CE. Personality Across the Life Span. *Annual Review of*  
478 *Psychology*. 2019;70(1):423–48.
- 479 37. Roberts BW, Mroczek D. Personality Trait Change in Adulthood. *Curr Dir Psychol Sci*. 2008 Feb  
480 1;17(1):31–5.
- 481 38. Denissen JJA, Luhmann M, Chung JM, Bleidorn W. Transactions between life events and  
482 personality traits across the adult lifespan. *Journal of Personality and Social Psychology*.  
483 2019;116(4):612–33.
- 484 39. Lehmann J, Boesch C. To fission or to fusion: effects of community size on wild chimpanzee (Pan  
485 troglodytes verus) social organisation. *Behav Ecol Sociobiol*. 2004 Jul 1;56(3):207–16.
- 486 40. Shizuka D, Johnson AE. The long view on demographic effects on social networks: a response to  
487 comments on Shizuka and Johnson. *Behav Ecol* [Internet]. [cited 2019 Nov 21]; Available from:  
488 <https://academic.oup.com/beheco/advance-article/doi/10.1093/beheco/arz184/5618606>
- 489 41. Mitani JC. Male chimpanzees form enduring and equitable social bonds. *Animal Behaviour*. 2009  
490 Mar 1;77(3):633–40.

- 491 42. Gilby IC, Brent LNJ, Wroblewski EE, Rudicell RS, Hahn BH, Goodall J, et al. Fitness benefits of  
492 coalitionary aggression in male chimpanzees. *Behav Ecol Sociobiol.* 2013 Mar 1;67(3):373–81.
- 493 43. Samuni, Preis A., Mielke A., Deschner T., Wittig R. M., Crockford C. Social bonds facilitate  
494 cooperative resource sharing in wild chimpanzees. *Proceedings of the Royal Society B: Biological*  
495 *Sciences.* 2018 Oct 10;285(1888):20181643.
- 496 44. Samuni L, Preis A, Mundry R, Deschner T, Crockford C, Wittig RM. Oxytocin reactivity during  
497 intergroup conflict in wild chimpanzees. *PNAS.* 2017 Jan 10;114(2):268–73.
- 498 45. Mielke A, Preis A, Samuni L, Gogarten JF, Wittig RM, Crockford C. Flexible decision-making in  
499 grooming partner choice in sooty mangabeys and chimpanzees. *Royal Society Open Science.*  
500 2018;5(7):172143.
- 501 46. Surbeck M, Langergraber KE, Fruth B, Vigilant L, Hohmann G. Male reproductive skew is higher in  
502 bonobos than chimpanzees. *Current Biology.* 2017 Jul 10;27(13):R640–1.
- 503 47. Newton-Fisher NE, Thompson ME, Reynolds V, Boesch C, Vigilant L. Paternity and social rank in  
504 wild chimpanzees (*Pan troglodytes*) from the Budongo Forest, Uganda. *American Journal of*  
505 *Physical Anthropology.* 2010;142(3):417–28.
- 506 48. Wroblewski EE, Murray CM, Keele BF, Schumacher-Stankey JC, Hahn BH, Pusey AE. Male  
507 dominance rank and reproductive success in chimpanzees, *Pan troglodytes schweinfurthii*. *Animal*  
508 *Behaviour.* 2009 Apr 1;77(4):873–85.
- 509 49. Murray CM, Mane SV, Pusey AE. Dominance rank influences female space use in wild  
510 chimpanzees, *Pan troglodytes*: towards an ideal despotic distribution. *Animal Behaviour.* 2007 Dec  
511 1;74(6):1795–804.
- 512 50. Wittig RM, Boesch C. Food Competition and Linear Dominance Hierarchy Among Female  
513 Chimpanzees of the Tai National Park. *International Journal of Primatology.* 2003 Aug 1;24(4):847–  
514 67.
- 515 51. Pusey A, Williams J, Goodall J. The Influence of Dominance Rank on the Reproductive Success of  
516 Female Chimpanzees. *Science.* 1997 Aug 8;277(5327):828–31.
- 517 52. Mielke A, Crockford C, Wittig RM. Rank Changes in Female Chimpanzees in Tai National Park. In:  
518 Wittig RM, editor. *The Chimpanzees of the Tai Forest: 40 Years of Research.* Cambridge University  
519 Press; 2019.
- 520 53. Lehmann J, Korstjens AH, Dunbar RIM. Group size, grooming and social cohesion in primates.  
521 *Animal Behaviour.* 2007 Dec 1;74(6):1617–29.
- 522 54. Altmann J. Observational study of behavior: Sampling methods. *Behaviour.* 1974;49(3–4):227–66.
- 523 55. Boesch C, Boesch-Achermann H. *The chimpanzees of the Tai Forest: Behavioural ecology and*  
524 *evolution.* Oxford: Oxford University Press; 2000.

- 525 56. Wittig RM, Boesch C. Observation Protocol and Long-Term Data Collection in Tai. In: Boesch C,  
526 Wittig RM, Crockford C, Vigilant L, Deschner T, Leendertz F, editors. *The Chimpanzees of the Tai*  
527 *Forest: 40 Years of Research* [Internet]. Cambridge University Press; 2019 [cited 2019 Dec 11].  
528 Available from: [https://www.nhbs.com/the-chimpanzees-of-the-tai-forest-40-years-of-research-](https://www.nhbs.com/the-chimpanzees-of-the-tai-forest-40-years-of-research-book)  
529 [book](https://www.nhbs.com/the-chimpanzees-of-the-tai-forest-40-years-of-research-book)
- 530 57. Whitehead H. *Analyzing animal societies: quantitative methods for vertebrate social analysis*.  
531 Chicago, USA: University of Chicago Press; 2008.
- 532 58. Farine DR, Whitehead H. Constructing, conducting and interpreting animal social network analysis.  
533 Altizer S, editor. *Journal of Animal Ecology*. 2015 Sep;84(5):1144–63.
- 534 59. Surbeck M, Girard-Buttoz C, Boesch C, Crockford C, Fruth B, Hohmann G, et al. Sex-specific  
535 association patterns in bonobos and chimpanzees reflect species differences in cooperation. *Royal*  
536 *Society Open Science*. 2017;4(5):1–20.
- 537 60. R Development Core Team. *R: A language and environment for statistical computing*. R Foundation  
538 for Statistical Computing Vienna Austria. 2016;0:{ISBN} 3-900051-07-0.
- 539 61. Bates D, Mächler M, Bolker BM, Walker SC. Fitting linear mixed-effects models using lme4. *Journal*  
540 *of Statistical Software*. 2015;67(1):1–48.
- 541 62. Foerster S, Franz M, Murray CM, Gilby IC, Feldblum JT, Walker KK, et al. Chimpanzee females  
542 queue but males compete for social status. *Scientific Reports*. 2016 Dec 14;6(1):1–11.
- 543 63. Mielke A, Samuni L, Preis A, Gogarten JF, Crockford C, Wittig RM. Bystanders intervene to impede  
544 grooming in Western chimpanzees and sooty mangabeys. *Royal Society Open Science*.  
545 2017;4(11):171296.
- 546 64. Riedel J, Franz M, Boesch C. How feeding competition determines female chimpanzee  
547 gregariousness and ranging in the Tai National Park, Côte d’Ivoire. *American Journal of*  
548 *Primatology*. 2011 Apr;73(4):305–13.
- 549 65. Wittiger L, Boesch C. Female gregariousness in Western Chimpanzees (*Pan troglodytes verus*) is  
550 influenced by resource aggregation and the number of females in estrus. *Behavioral Ecology and*  
551 *Sociobiology*. 2013;67(7):1097–111.
- 552 66. Foerster S, McLellan K, Schroeffer-Walker K, Murray CM, Krupenye C, Gilby IC, et al. Social bonds  
553 in the dispersing sex: Partner preferences among adult female chimpanzees. *Animal Behaviour*.  
554 2015;105:139–52.
- 555 67. Mielke A, Preis A, Samuni L, Gogarten JF, Wittig RM, Crockford C. Flexible decision-making in  
556 grooming partner choice in sooty mangabeys and chimpanzees. *Royal Society Open Science*.  
557 2018;5(172143).
- 558 68. Pepper JW, Mitani JC, Watts DP. General Gregariousness and Specific Social Preferences among  
559 Wild Chimpanzees. *International Journal of Primatology*. 1999;20(5).

- 560 69. Wessling EG, Deschner T, Mundry R, Pruett JD, Wittig RM, Kühl HS. Seasonal Variation in  
561 Physiology Challenges the Notion of Chimpanzees (*Pan troglodytes verus*) as a Forest-Adapted  
562 Species. *Frontiers in Ecology and Evolution*. 2018;6.
- 563 70. Dobson AJ. An introduction to generalized linear models. New York. London: Chapman & Hall/CRC;  
564 2002. 225 p.
- 565 71. Baayen RH, Davidson DJ, Bates DM. Mixed-effects modeling with crossed random effects for  
566 subjects and items. *Journal of Memory and Language*. 2008;59(4):390–412.
- 567 72. Schielzeth H, Forstmeier W. Conclusions beyond support: Overconfident estimates in mixed  
568 models. *Behavioral Ecology*. 2009;20(2):416–20.
- 569 73. Schielzeth H. Simple means to improve the interpretability of regression coefficients. *Methods in  
570 Ecology and Evolution*. 2010 Feb 10;1(2):103–13.
- 571 74. Nakagawa S, Schielzeth H. Repeatability for Gaussian and non-Gaussian data: A practical guide for  
572 biologists. Vol. 85, *Biological Reviews*. 2010. p. 935–56.
- 573 75. Nakagawa S, Schielzeth H. A general and simple method for obtaining R<sup>2</sup> from generalized linear  
574 mixed-effects models. *Methods in Ecology and Evolution*. 2013;4(2):133–42.
- 575 76. Bartoń K. *MuMIn: Multi-Model Inference*. 2018.
- 576 77. Dingemanse NJ, Dochtermann NA. Quantifying individual variation in behaviour: mixed-effect  
577 modelling approaches. *Journal of Animal Ecology*. 2013;82(1):39–54.
- 578 78. Field AP, Miles J, Field Z. *Discovering Statistics Using R*. Vol. 58, *Statistics*. 2012. 53-57 p.
- 579 79. Fox J, Weisberg S, Adler D, Bates DM, Baud-Bovy G, Ellison S, et al. Package ‘car.’ R topics  
580 documented. 2014;167.
- 581 80. Bell AM, Hankison SJ, Laskowski KL. The repeatability of behaviour: a meta-analysis. *Animal  
582 Behaviour*. 2009 Apr 1;77(4):771–83.
- 583 81. Nishida T. Alpha status and agonistic alliance in wild chimpanzees (*Pan troglodytes schweinfurthii*).  
584 *Primates*. 1983 Jul 1;24(3):318–36.
- 585 82. Duffy KG, Wrangham RW, Silk JB. Male chimpanzees exchange political support for mating  
586 opportunities. *Current Biology*. 2007 Aug 7;17(15):R586–7.
- 587 83. Crockford C, Wittig RM, Langergraber K, Ziegler TE, Zuberbühler K, Deschner T. Urinary oxytocin  
588 and social bonding in related and unrelated wild chimpanzees. *Proc R Soc B*. 2013 Mar  
589 22;280(1755):20122765.
- 590 84. Cowlshaw G, Dunbar RIM. Dominance rank and mating success in male primates. *Animal  
591 Behaviour*. 1991 Jun 1;41(6):1045–56.
- 592 85. Silk JB. Social Components of Fitness in Primate Groups. *Science*. 2007 Sep 7;317(5843):1347–51.

- 593 86. Langergraber K, Mitani J, Vigilant L. Kinship and social bonds in female chimpanzees (*Pan*  
594 troglodytes). *American Journal of Primatology*. 2009;71(10):840–51.
- 595 87. Muller MN, Wrangham RW. Dominance, cortisol and stress in wild chimpanzees (<Emphasis  
596 Type="Italic">*Pan troglodytes schweinfurthii*</Emphasis>). *Behav Ecol Sociobiol*. 2004 Feb  
597 1;55(4):332–40.
- 598 88. Anestis SF. Testosterone in juvenile and adolescent male chimpanzees (*Pan troglodytes*): Effects of  
599 dominance rank, aggression, and behavioral style. *American Journal of Physical Anthropology*.  
600 2006;130(4):536–45.
- 601 89. Preis A, Samuni L, Deschner T, Crockford C, Wittig RM. Urinary Cortisol, Aggression, Dominance  
602 and Competition in Wild, West African Male Chimpanzees. *Front Ecol Evol [Internet]*. 2019 [cited  
603 2019 Nov 21];7. Available from:  
604 <https://www.frontiersin.org/articles/10.3389/fevo.2019.00107/full>
- 605 90. Wittig RM, Boesch C. “Decision-making” in conflicts of wild chimpanzees (*Pan troglodytes*): an  
606 extension of the Relational Model. *Behav Ecol Sociobiol*. 2003 Sep 1;54(5):491–504.
- 607 91. Georgiev AV, Klimczuk ACE, Traficante DM, Maestriperi D. When Violence Pays: A Cost-Benefit  
608 Analysis of Aggressive Behavior in Animals and Humans. *Evol Psychol*. 2013 Jul  
609 1;11(3):147470491301100320.
- 610 92. Wittig RM, Crockford C, Weltring A, Deschner T, Zuberbühler K. Single Aggressive Interactions  
611 Increase Urinary Glucocorticoid Levels in Wild Male Chimpanzees. *PLOS ONE*. 2015 Feb  
612 25;10(2):e0118695.
- 613 93. Wrangham RW, Wilson ML, Muller MN. Comparative rates of violence in chimpanzees and  
614 humans. *Primates*. 2006 Jan 1;47(1):14–26.
- 615 94. Wilson ML, Boesch C, Fruth B, Furuichi T, Gilby IC, Hashimoto C, et al. Lethal aggression in *Pan* is  
616 better explained by adaptive strategies than human impacts. *Nature*. 2014 Sep;513(7518):414–7.
- 617 95. MacIntosh AJ, Jacobs A, Garcia C, Shimizu K, Mouri K, Huffman MA, et al. Monkeys in the Middle:  
618 Parasite Transmission through the Social Network of a Wild Primate. *PLOS ONE*. 2012 Dec  
619 5;7(12):e51144.
- 620 96. Rushmore J, Caillaud D, Matamba L, Stumpf RM, Borgatti SP, Altizer S. Social network analysis of  
621 wild chimpanzees provides insights for predicting infectious disease risk. *Journal of Applied  
622 Ecology*. 2014 Mar 1;976–86.
- 623 97. Tkaczynski P, MacLarnon A, Ross C. Associations between spatial position, stress and anxiety in  
624 forest baboons *Papio anubis*. *Behavioural Processes*. 2014 Oct 1;108:1–6.
- 625 98. Siegler K, Sachser N, Kaiser S. The social environment during pregnancy and lactation shapes the  
626 behavioral and hormonal profile of male offspring in wild cavies. *Developmental Psychobiology*.  
627 2011;53(6):575–84.

628 99. Sachser N, Hennessy MB, Kaiser S. The adaptive shaping of social behavioural phenotypes during  
629 adolescence. *Biology Letters*. 2018 Nov 30;14(11):20180536.

630



# Effect Size Individual Identity

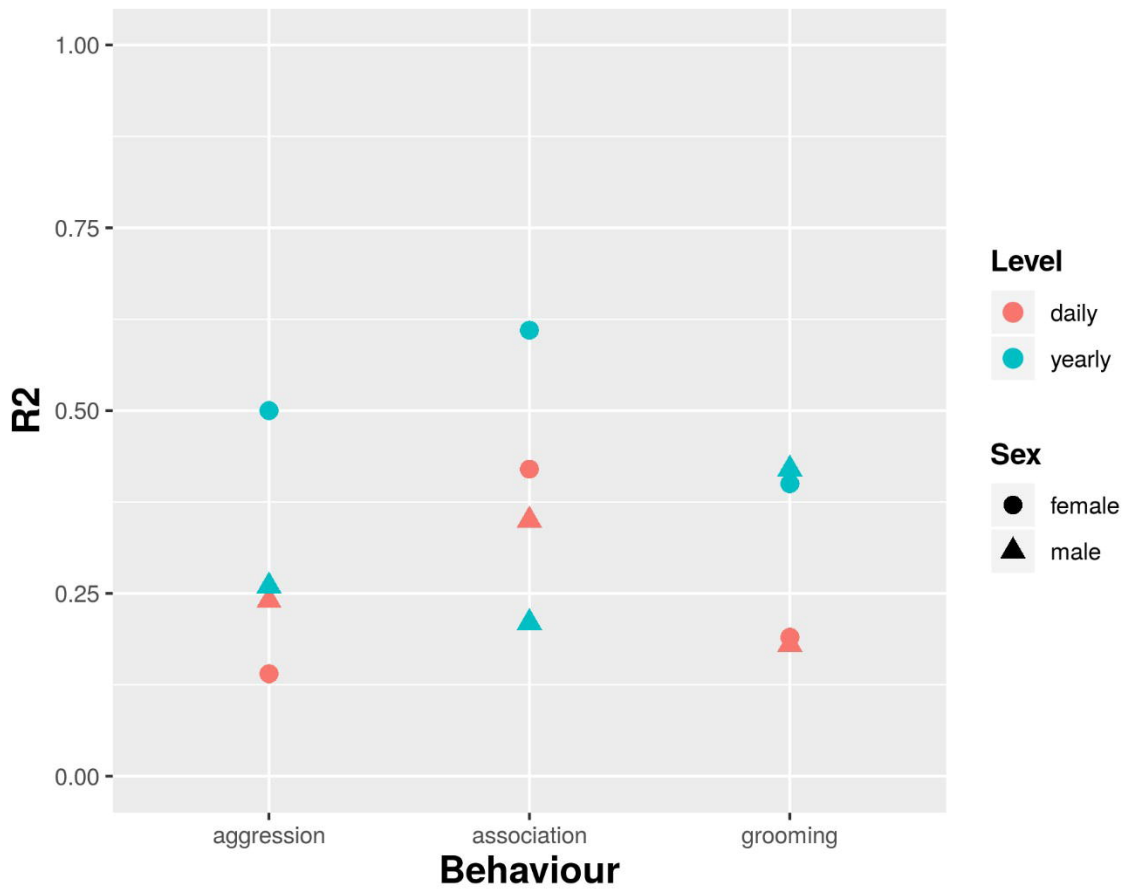

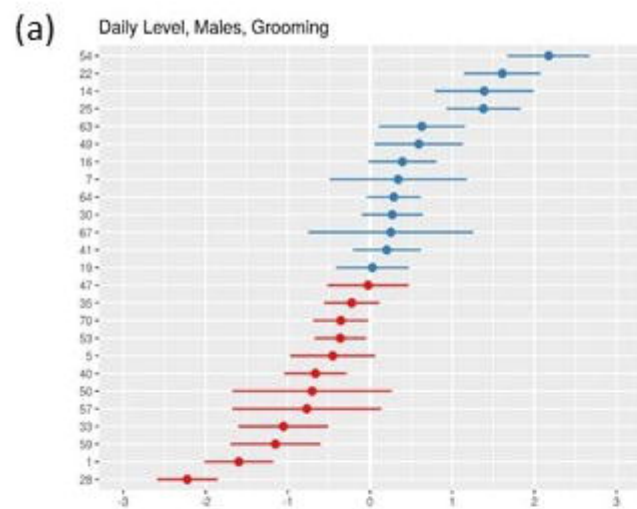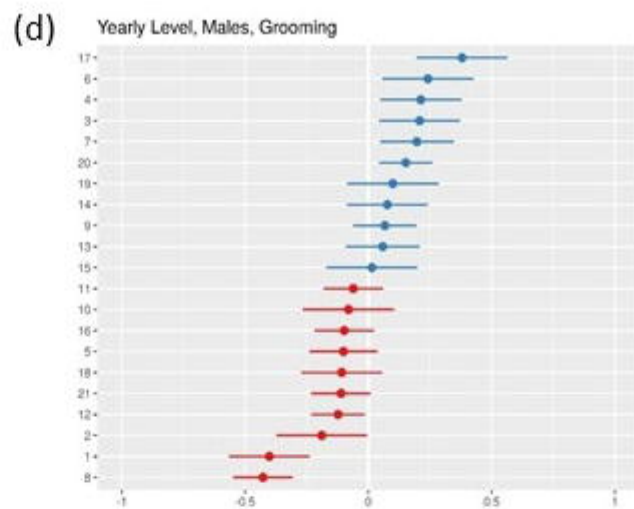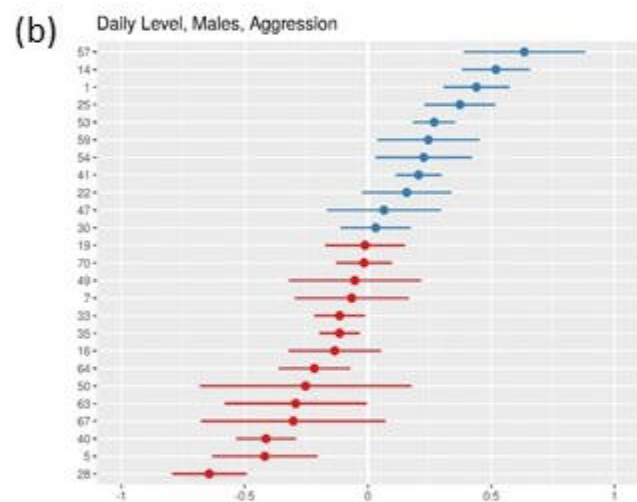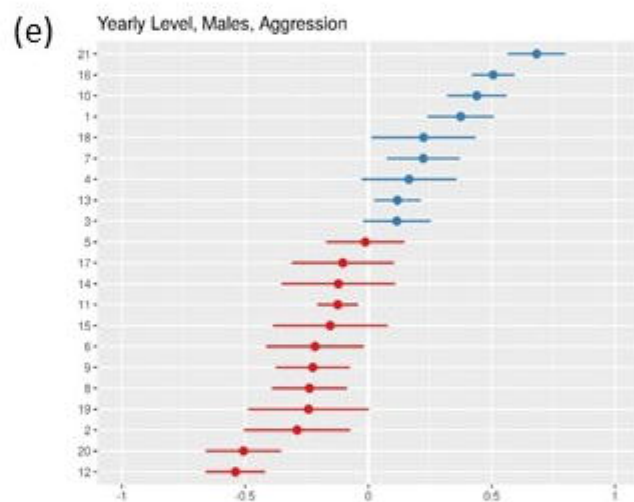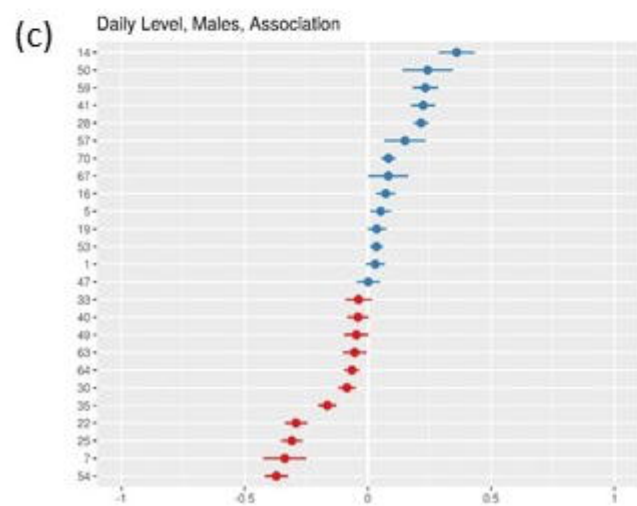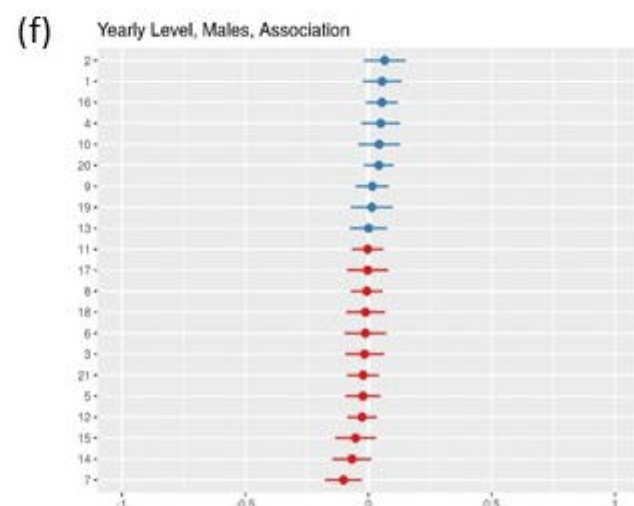

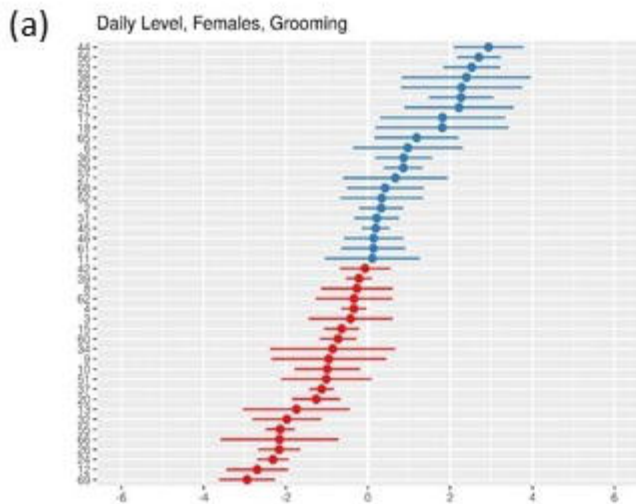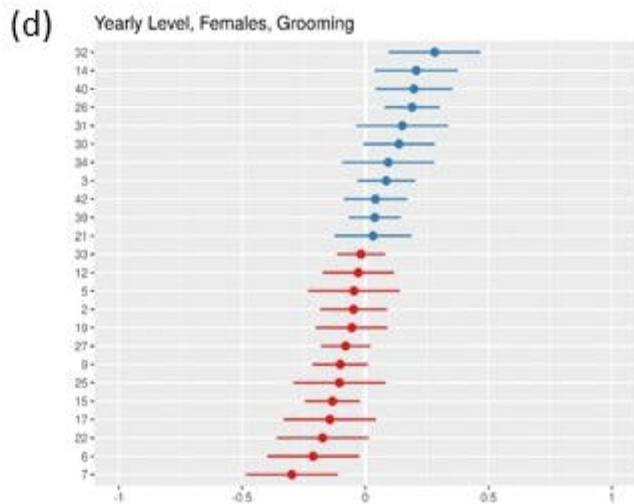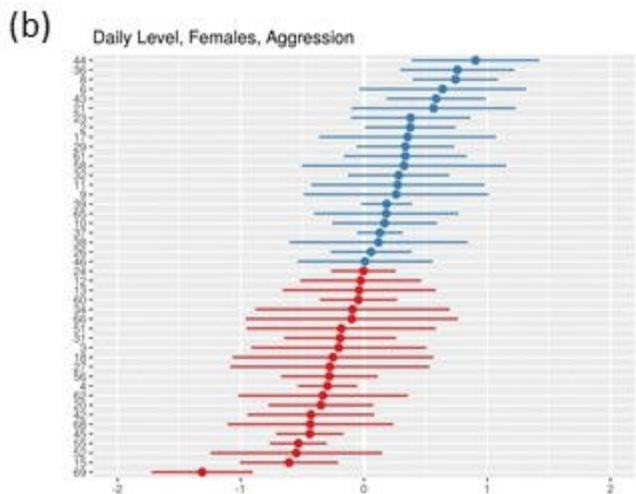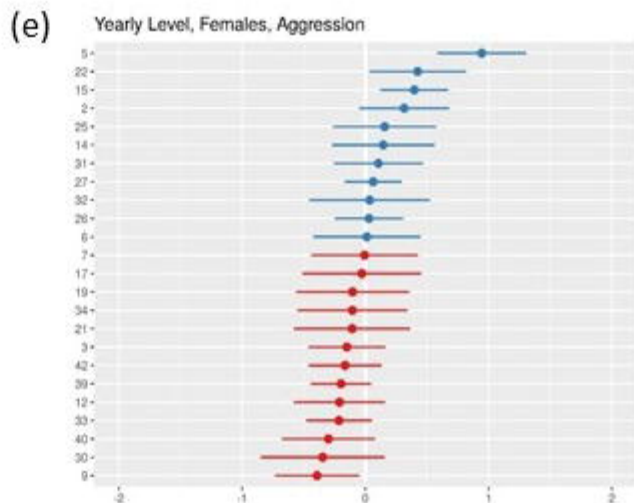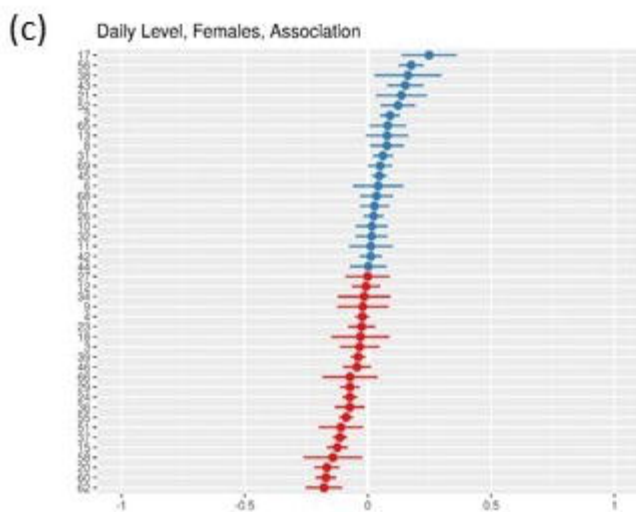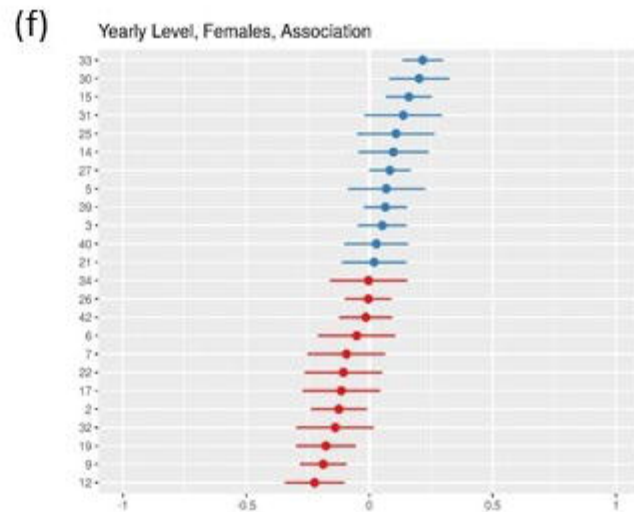

Source: https://www.biorxiv.org/content/10.1101/2020.02.12.945857v1.full.pdf
